# Supplementary material
Source: Springer Nature journal article supplement (https://www.springermedizin.de/resource/supplementary/12913_2013_3480_MOESM2_ESM.pdf/9532964)

Figure 1: Caregivers' health service utilization flow for child's recent illness

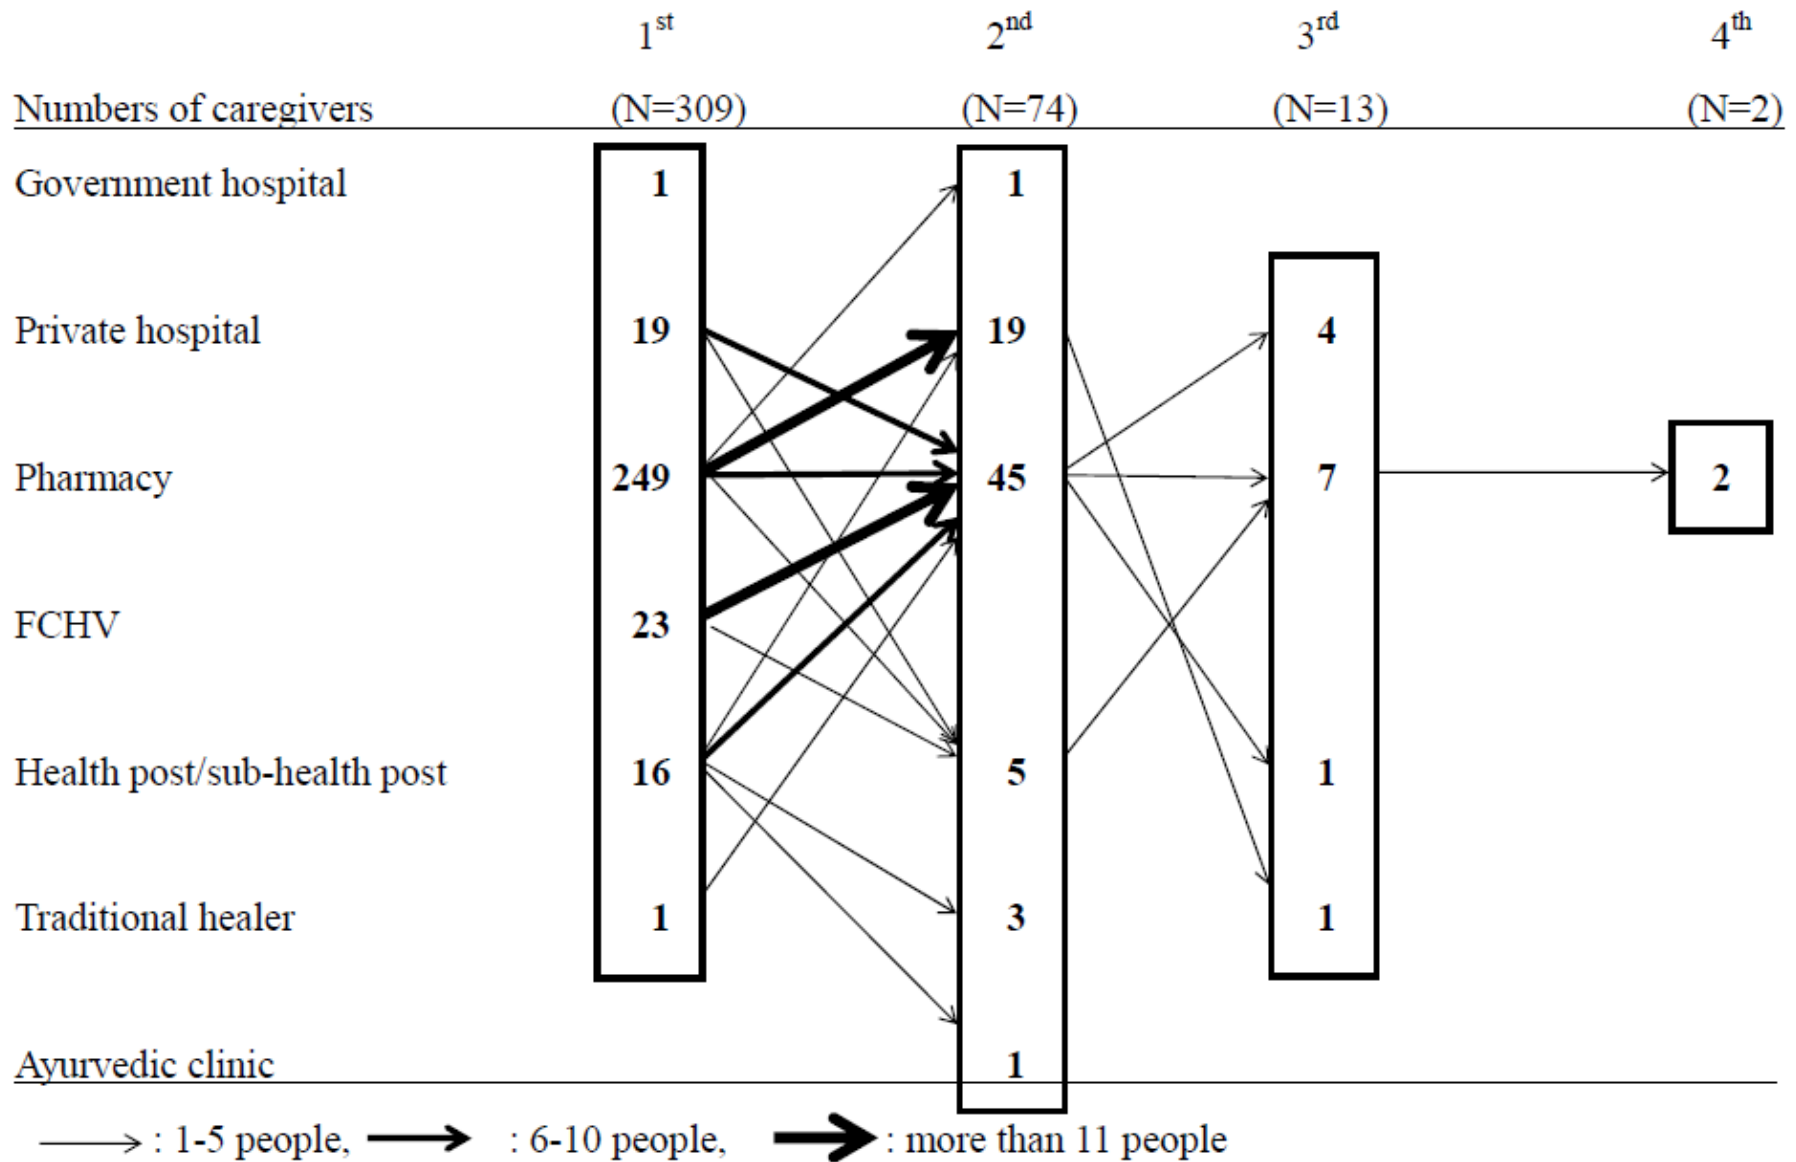

Supplement: MOESM2 [file 9532964]
